# Supplementary material
Source: MDPI journal article supplement (https://www.mdpi.com/2673-4532/4/1/3)
Supplement: s1 [file s1]

# Microplastics and Per- and Polyfluoroalkyl Substances (PFAS) Analysis in Sea Turtles and Bottlenose Dolphins along Mississippi's Coast

Chanaka M. Navarathna <sup>1,†</sup>, Hannah Pray <sup>2,†</sup>, Prashan M. Rodrigo <sup>1,†</sup>, Beatrice Arwenyo <sup>1</sup>, Cassidy McNeely <sup>1</sup>, Henry Reynolds <sup>1</sup>, Natalie Hampton <sup>3</sup>, Katherine Lape <sup>1</sup>, Katie Roman <sup>1</sup>, Maddie Heath <sup>1</sup>, Sean Stokes <sup>1</sup>, Sameera R. Gunatilake <sup>4</sup>, Gombojav Ariunbold <sup>5</sup>, Felio Perez <sup>6</sup>, Rooban V. K. G. Thirumalai <sup>7</sup>, El Barbary Hassan <sup>8</sup>, Islam Elsayed <sup>8,9</sup>, Dinesh Mohan <sup>10</sup>, Ashli Brown <sup>11,12</sup>, Debra Moore <sup>2,13</sup>, Stephen Reichley <sup>2,13</sup>, Mark Lawrence <sup>13,14</sup> and Todd E. Mlsna <sup>1,\*</sup>

<sup>1</sup> Department of Chemistry, Mississippi State University, Starkville, MS 39762, USA

<sup>2</sup> Department of Clinical Sciences, College of Veterinary Medicine, Mississippi State University, Starkville, MS 39762, USA

<sup>3</sup> Department of Biological Sciences, Tougaloo College, Tougaloo, MS 39174, USA

<sup>4</sup> College of Chemical Sciences, Institute of Chemistry Ceylon, Rajagiriya, CO 10100, Sri Lanka

<sup>5</sup> Department of Physics and Astronomy, Mississippi State University, Starkville, MS 39762, USA

<sup>6</sup> Material Science Lab, Integrated Microscopy Center, University of Memphis, Memphis, Tennessee 38152, USA

<sup>7</sup> Institute of Imaging and Analytic Technology (I<sup>2</sup>AT), Mississippi State University, Starkville, MS 39762, USA

<sup>8</sup> Department of Sustainable Bioproducts, Mississippi State University, Box 9820, Starkville, MS 39762, USA

<sup>9</sup> Department of Chemistry, Faculty of Science, Damietta University, New Damietta, Damietta Governorate 34517, Egypt

<sup>10</sup> School of Environmental Sciences, Jawaharlal Nehru University, New Delhi 110067, India

<sup>11</sup> Department of Biochemistry, Mississippi State University, Starkville, MS 39762, USA

<sup>12</sup> Mississippi State Chemical Laboratory, Mississippi State University, Starkville, MS 39762, USA

<sup>13</sup> Global Center for Aquatic Health and Food Security, Mississippi State University, Starkville, MS 39762, USA

<sup>14</sup> Comparative Biomedical Sciences, College of Veterinary Medicine, Mississippi State University, Starkville, MS 39762, USA

\* Correspondence: tmlsna@chemistry.msstate.edu; Tel.: 662-325-6744; Fax: 662-325-1618

† These authors contributed equally to this work.

\* Correspondence: **Author** \*(Tel: 662- 325-6744; fax: 662-325-1618;

email: Tmlsna@chemistry.msstate.edu)

**Table S1.** The characteristics of microplastics found in each sample, where DS stands for dolphin stomach, DI stands for dolphin intestine, STS stands for sea turtle stomach, and STI stands for sea turtle intestine.

| Sample | Mass (g) | Morphology |        |         |         | Total | Color of Fluorescence |      |       |       |
|--------|----------|------------|--------|---------|---------|-------|-----------------------|------|-------|-------|
|        |          | Fragments  | Fibers | Pellets | Unknown |       | Blue                  | Pink | Green | White |
| DS 1   | 2.00     | 0          | 1      | 3       | 0       | 4     | 0                     | 4    | 0     | 0     |

|       |      |   |    |    |      |    |    |      |   |    |
|-------|------|---|----|----|------|----|----|------|---|----|
| DS 2  | 2.04 | 0 | 0  | 2  | 0    | 2  | 0  | 2    | 0 | 0  |
| DS3   | 2.01 | 0 | 0  | 2  | 0    | 2  | 0  | 2    | 0 | 0  |
| DS 4  | 2.01 | 0 | 0  | 12 | TMTC | NA | 0  | TMTC | 0 | 12 |
| DS 5  | 2.06 | 0 | 0  | 8  | TMTC | NA | 8  | TMTC | 0 | 0  |
| DS 6  | 2.07 | 0 | 0  | 5  | 0    | 5  | 0  | 1    | 0 | 4  |
| DS 7  | 2.14 | 0 | 0  | 13 | TMTC | NA | 12 | TMTC | 1 | 0  |
| DS 8  | 2.03 | 0 | 2  | 5  | TMTC | 7  | 0  | TMTC | 0 | 7  |
| DS 9  | 2.02 | 0 | 0  | 23 | 0    | 23 | 21 | 2    | 0 | 0  |
| DS 10 | 2.13 | 0 | 14 | 14 | 0    | 28 | 18 | 10   | 0 | 0  |
| STS 1 | 2.10 | 0 | 0  | 6  | TMTC | NA | 6  | TMTC | 0 | 0  |
| STS 2 | 2.02 | 0 | 0  | 3  | TMTC | NA | 3  | TMTC | 0 | 0  |
| STS 3 | 2.20 | 1 | 0  | 5  | TMTC | NA | 5  | TMTC | 0 | 1  |
| STS 4 | 2.08 | 0 | 0  | 14 | TMTC | NA | 12 | TMTC | 0 | 2  |
| STS 5 | 2.10 | 0 | 0  | 10 | TMTC | NA | 7  | TMTC | 0 | 3  |
| STS 6 | 2.02 | 0 | 0  | 2  | TMTC | NA | 0  | TMTC | 0 | 2  |
| STS 7 | 2.07 | 0 | 0  | 5  | 0    | 5  | 0  | 5    | 0 | 0  |
| STS 8 | 2.07 | 0 | 0  | 8  | TMTC | NA | 0  | TMTC | 0 | 8  |

|       |      |   |    |    |      |    |    |      |   |   |
|-------|------|---|----|----|------|----|----|------|---|---|
| STS 9 | 2.00 | 0 | 0  | 3  | 0    | 3  | 0  | 0    | 0 | 3 |
| STS10 | 2.04 | 0 | 0  | 3  | 0    | 3  | 0  | 1    | 0 | 2 |
| STI 1 | 2.14 | 1 | 0  | 4  | TMTC | NA | 4  | TMTC | 0 | 0 |
| STI2  | 2.32 | 0 | 0  | 8  | 0    | 8  | 2  | 6    | 0 | 0 |
| STI3  | 2.22 | 0 | 0  | 1  | 0    | 1  | 0  | 1    | 0 | 0 |
| STI4  | 2.39 | 0 | 0  | 13 | 0    | 13 | 13 | 0    | 0 | 0 |
| STI5  | 2.11 | 0 | 3  | 19 | 0    | 22 | 22 | 0    | 0 | 0 |
| STI6  | 2.26 | 0 | 8  | 8  | 0    | 16 | 16 | 0    | 0 | 0 |
| STI7  | 2.18 | 0 | 13 | 2  | 0    | 15 | 15 | 0    | 0 | 0 |
| STI8  | 2.35 | 0 | 11 | 4  | 0    | 15 | 15 | 0    | 0 | 0 |
| STI9  | 2.02 | 0 | 13 | 5  | 0    | 18 | 18 | 0    | 0 | 0 |
| STI10 | 2.40 | 1 | 19 | 3  | 0    | 23 | 21 | 1    | 0 | 1 |
| DI1   | 2.16 | 0 | 5  | 3  | 0    | 8  | 8  | 0    | 0 | 0 |
| DI2   | 2.40 | 0 | 3  | 22 | 0    | 25 | 17 | 8    | 0 | 0 |
| DI3   | 2.48 | 0 | 7  | 4  | 0    | 11 | 11 | 0    | 0 | 0 |
| DI4   | 2.01 | 0 | 8  | 4  | 0    | 12 | 12 | 0    | 0 | 0 |
| DI5   | 2.03 | 0 | 15 | 5  | 0    | 20 | 20 | 0    | 0 | 0 |

|      |      |   |    |    |      |    |    |      |   |      |
|------|------|---|----|----|------|----|----|------|---|------|
| DI6  | 2.42 | 0 | 0  | 8  | 0    | 8  | 8  | 0    | 0 | 0    |
| DI7  | 2.37 | 0 | 0  | 7  | 0    | 7  | 4  | 3    | 0 | 0    |
| DI8  | 2.05 | 0 | 1  | 19 | 0    | 20 | 14 | 3    | 0 | 3    |
| DI9  | 2.32 | 0 | 0  | 6  | TMTC | 6  | 6  | TMTC | 0 | 0    |
| DI10 | 2.25 | 0 | 11 | 6  | TMTC | 17 | 6  | TMTC | 0 | TMTC |
